# Supplementary material for: Discovering New G-Quadruplex DNA Catalysts in Enantioselective Sulfoxidation Reaction
Source: MDPI journal article supplement (doi:10.3390/ijms23031092), 2022-01-20

# Supplementary Material

## Discovering New G-Quadruplex DNA Catalysts in Enantioselective Sulfoxidation Reaction

Carmen Festa, Veronica Esposito, Daniela Benigno, Simona De Marino, Angela Zampella, Antonella Virgilio \* and Aldo Galeone

Department of Pharmacy, University of Naples Federico II, Via D. Montesano 49, I-80131 Naples, Italy;  
carmen.festa@unina.it (C.F.); verespos@unina.it (V.E.); daniela.benigno@unina.it (D.B.);  
sidemari@unina.it (S.D.M.); angela.zampella@unina.it (A.Z.); galeone@unina.it (A.G.)

\* Correspondence: antonella.virgilio@unina.it; Tel.: +39-081678536

### Table of contents

CD melting profiles

HPLC chromatograms

ESI-MS spectrum of CuL complex

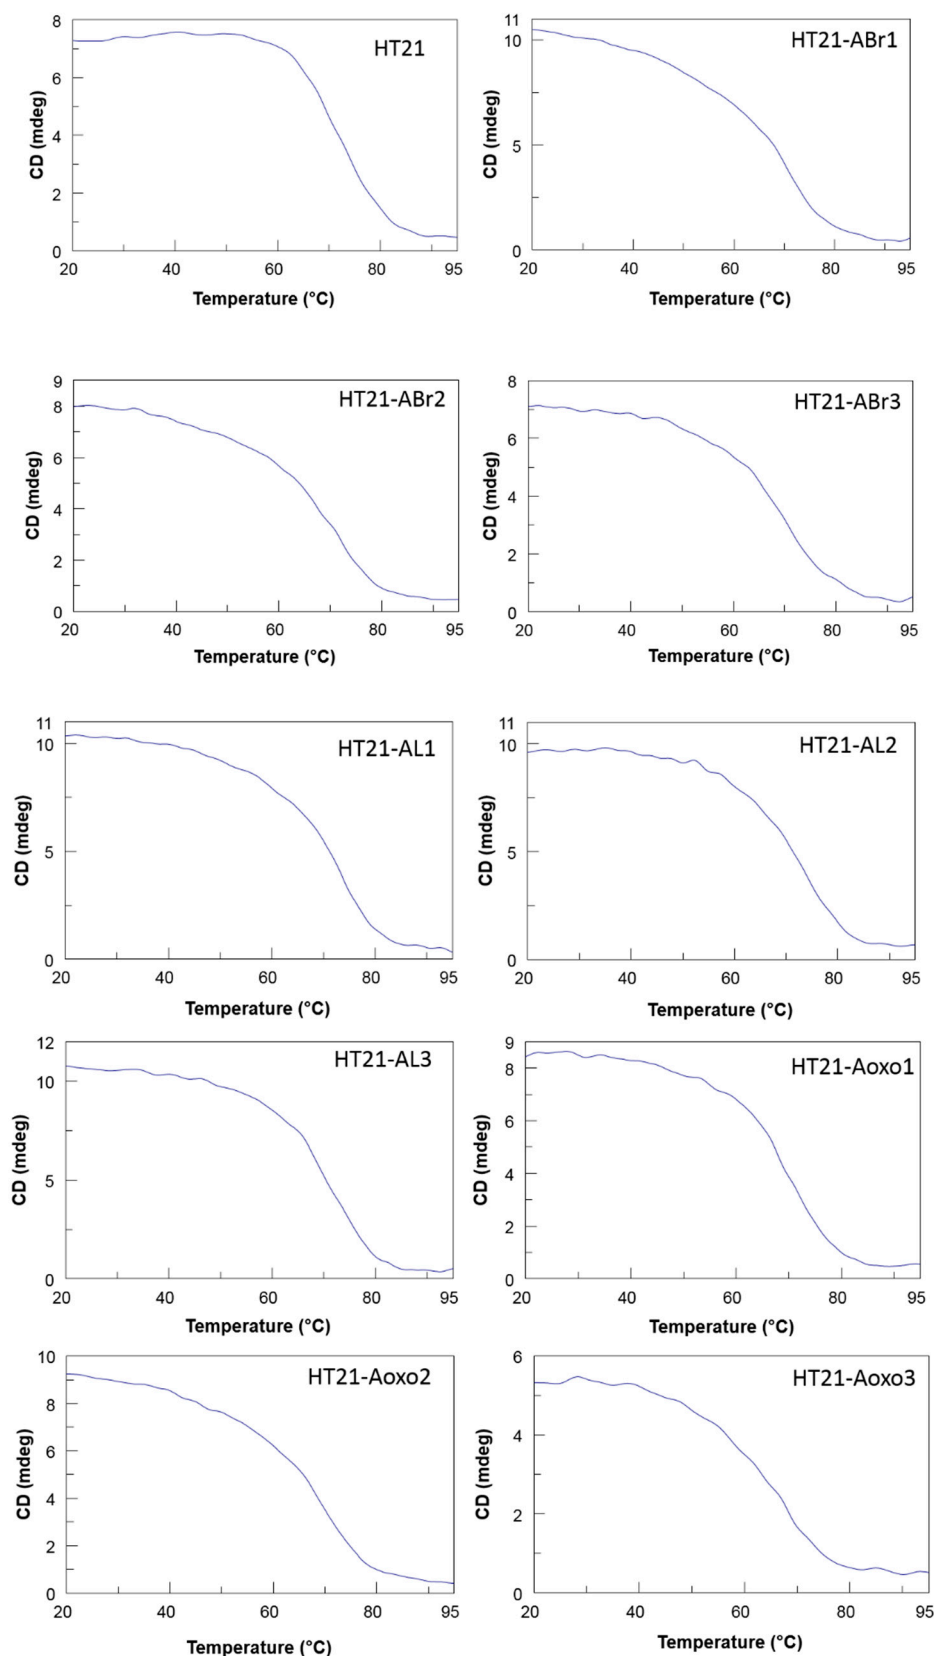

**Figure S1.** CD melting profiles of analyzed ODNs registered as a function of temperature for all modified quadruplexes at their maximum Cotton effect wavelengths. CD data were recorded in a 0.1 cm pathlength cuvette with a scan rate of 30 °C/h at 20  $\mu$ M ODN strand concentration in 20 mM MOPS buffer (pH 7.0) containing 150 mM KCl.

**HPLC chromatogram 1.** Sulfoxidation catalyzed by HT21-AL1•CuL.

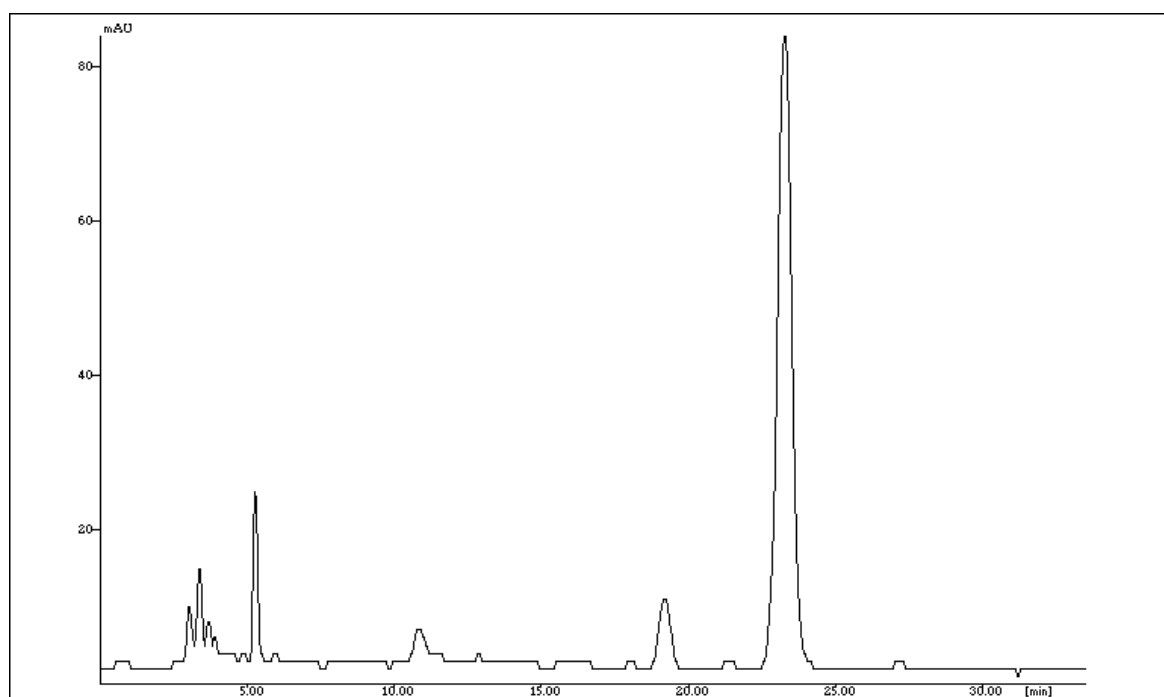

|   | Peak Name | Rt (Min) | Abs.Wind | %. Wind | Area    | Factor  | Peak.Group |
|---|-----------|----------|----------|---------|---------|---------|------------|
| 1 | 1         | 3.350    | 0.10     | 0.00    | 71.50   | 1.00000 |            |
| 2 | 2         | 19.100   | 0.10     | 0.00    | 231.00  | 1.00000 |            |
| 3 | Unknown   | 23.242   | 0.10     | 0.00    | 2575.00 | 1.00000 |            |

**HPLC chromatogram 2.** Sulfoxidation catalyzed by HT21-AL2•CuL.

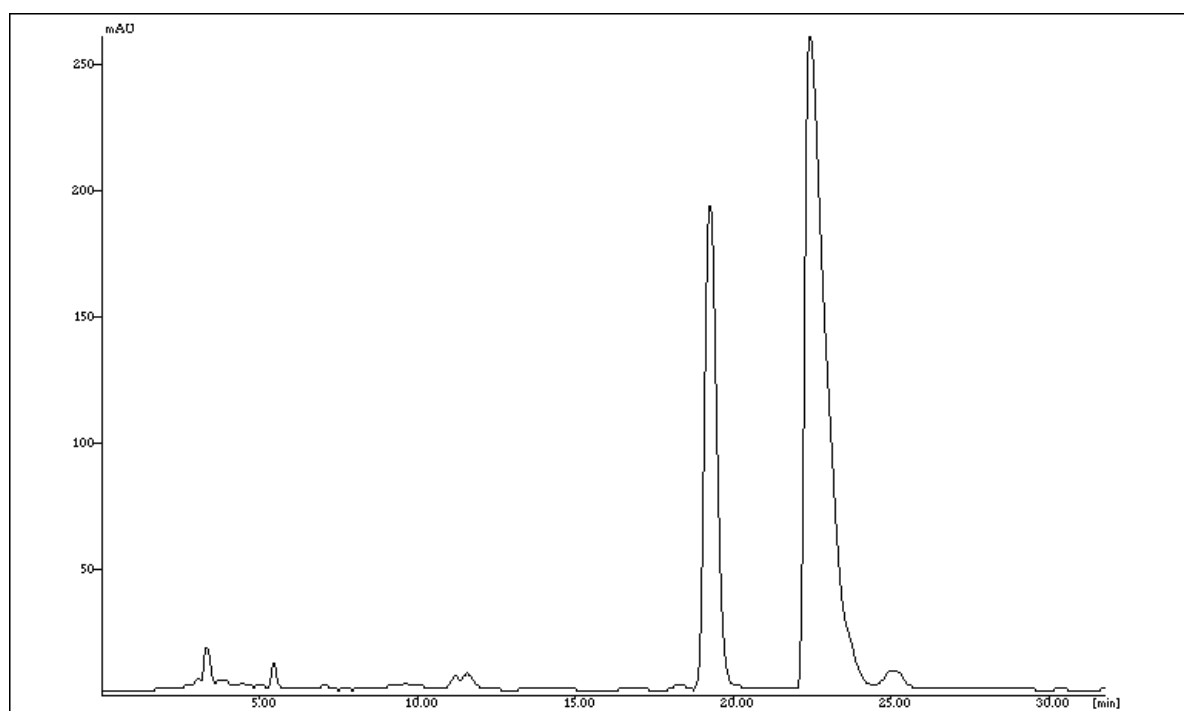

|   | Peak Name | Rt (Min) | Abs.Wind | %. Wind | Area     | Factor  | Peak.Group |
|---|-----------|----------|----------|---------|----------|---------|------------|
| 1 | 1         | 3.267    | 0.10     | 0.00    | 137.39   | 1.00000 |            |
| 2 | 2         | 19.233   | 0.10     | 0.00    | 3547.25  | 1.00000 |            |
| 3 | 2         | 22.400   | 0.10     | 0.00    | 11721.00 | 1.00000 |            |

**HPLC chromatogram 3.** Sulfoxidation catalyzed by HT21-AL3•CuL.

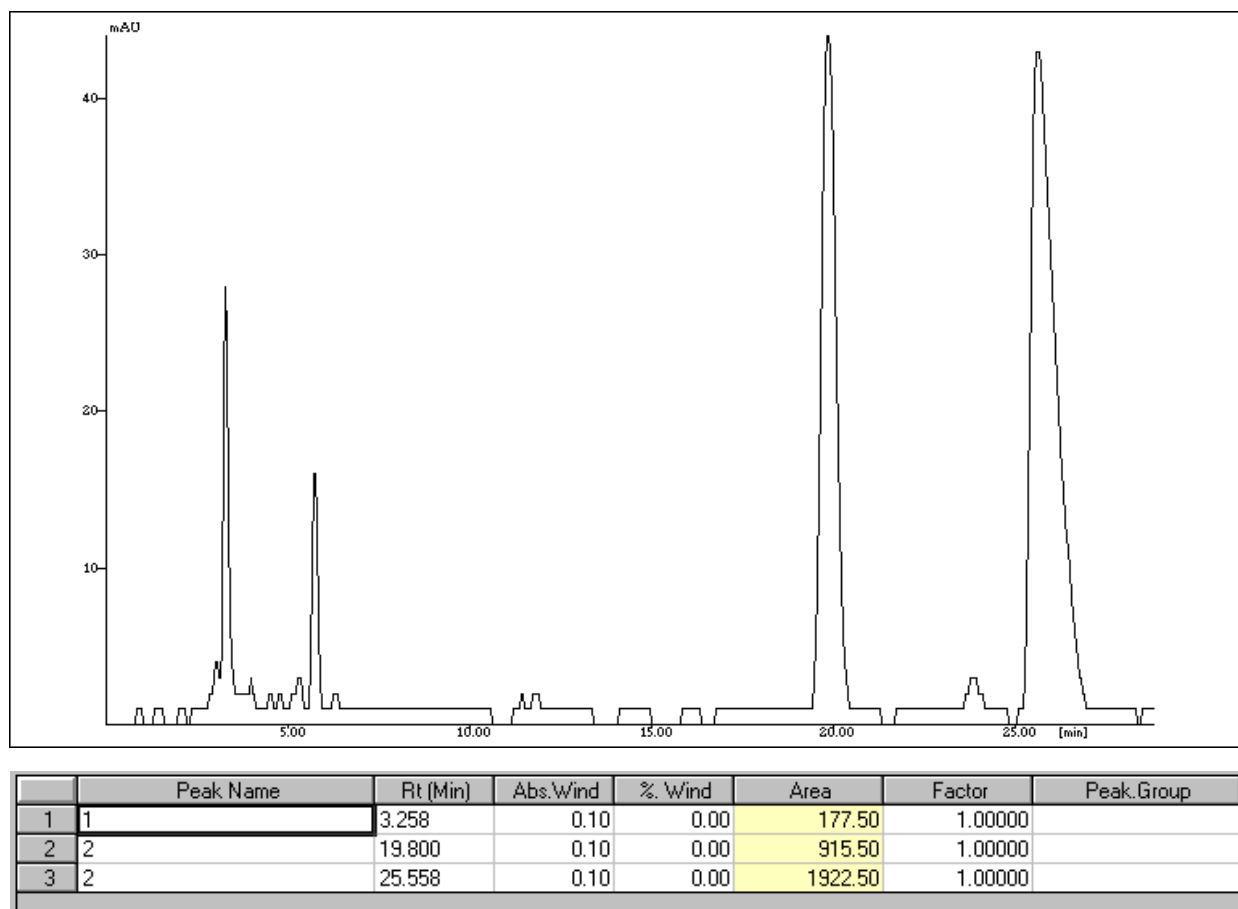

**HPLC chromatogram 4.** Sulfoxidation catalyzed by HT21-Aoxo1•CuL.

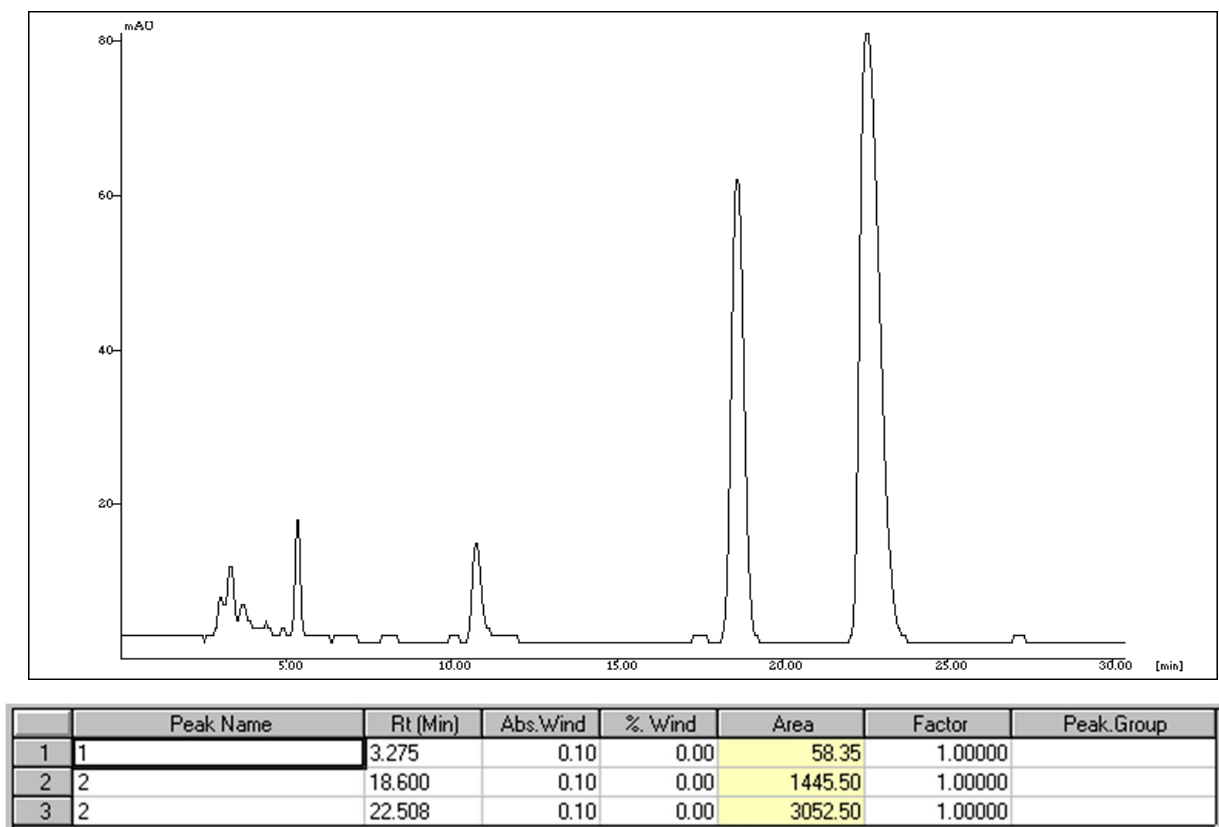

**HPLC chromatogram 5.** Sulfoxidation catalyzed by HT21-Aoxo2•CuL.

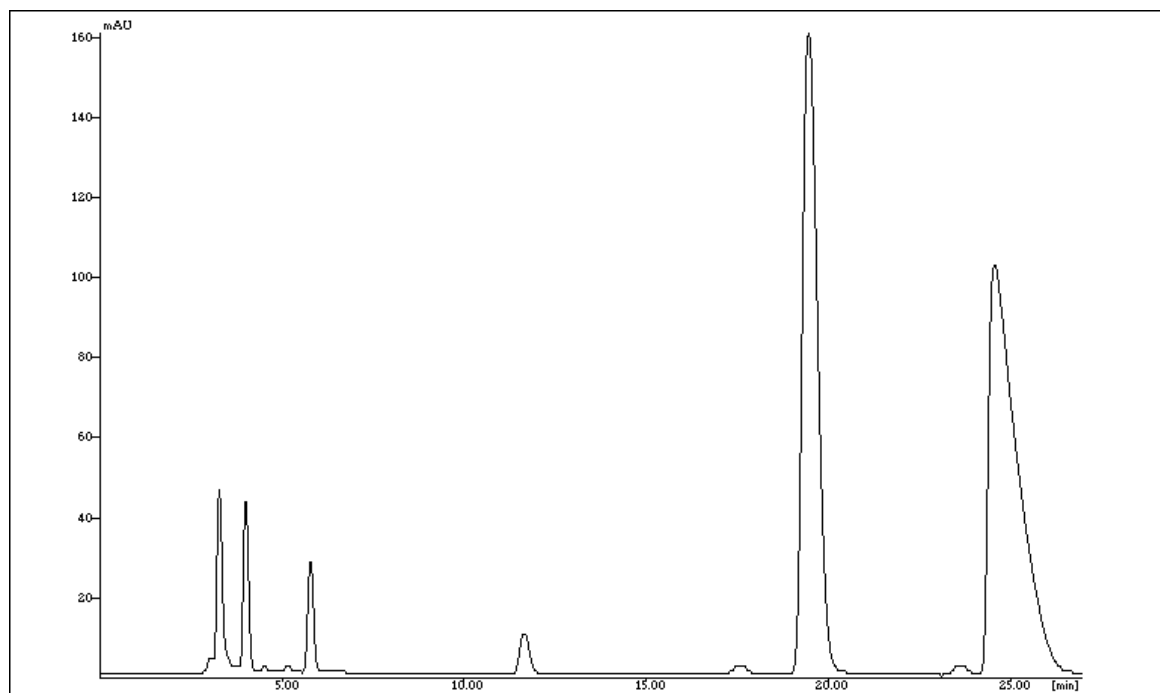

|   | Peak Name | Rt (Min) | Abs.Wind | %. Wind | Area    | Factor  | Peak.Group |
|---|-----------|----------|----------|---------|---------|---------|------------|
| 1 | 1         | 3.258    | 0.10     | 0.00    | 330.39  | 1.00000 |            |
| 2 | 2         | 19.442   | 0.10     | 0.00    | 4153.00 | 1.00000 |            |
| 3 | 2         | 24.533   | 0.10     | 0.00    | 5321.50 | 1.00000 |            |

**HPLC chromatogram 6.** Sulfoxidation catalyzed by HT21-Aoxo3•CuL.

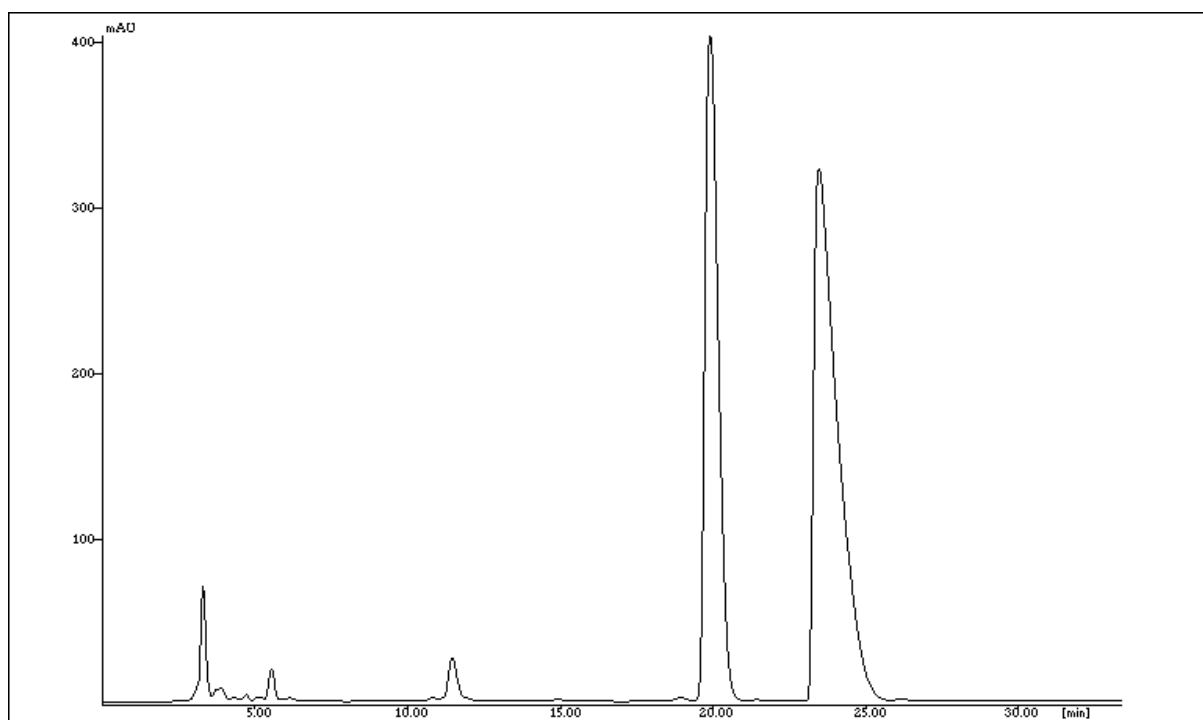

|   | Peak Name | Rt (Min) | Abs.Wind | %. Wind | Area     | Factor  | Peak.Group |
|---|-----------|----------|----------|---------|----------|---------|------------|
| 1 | 1         | 3.258    | 0.10     | 0.00    | 595.71   | 1.00000 |            |
| 2 | 2         | 19.867   | 0.10     | 0.00    | 10887.50 | 1.00000 |            |
| 3 | 2         | 23.425   | 0.10     | 0.00    | 16300.50 | 1.00000 |            |

**HPLC chromatogram 7.** Sulfoxidation catalyzed by HT21-ABr1•CuL.

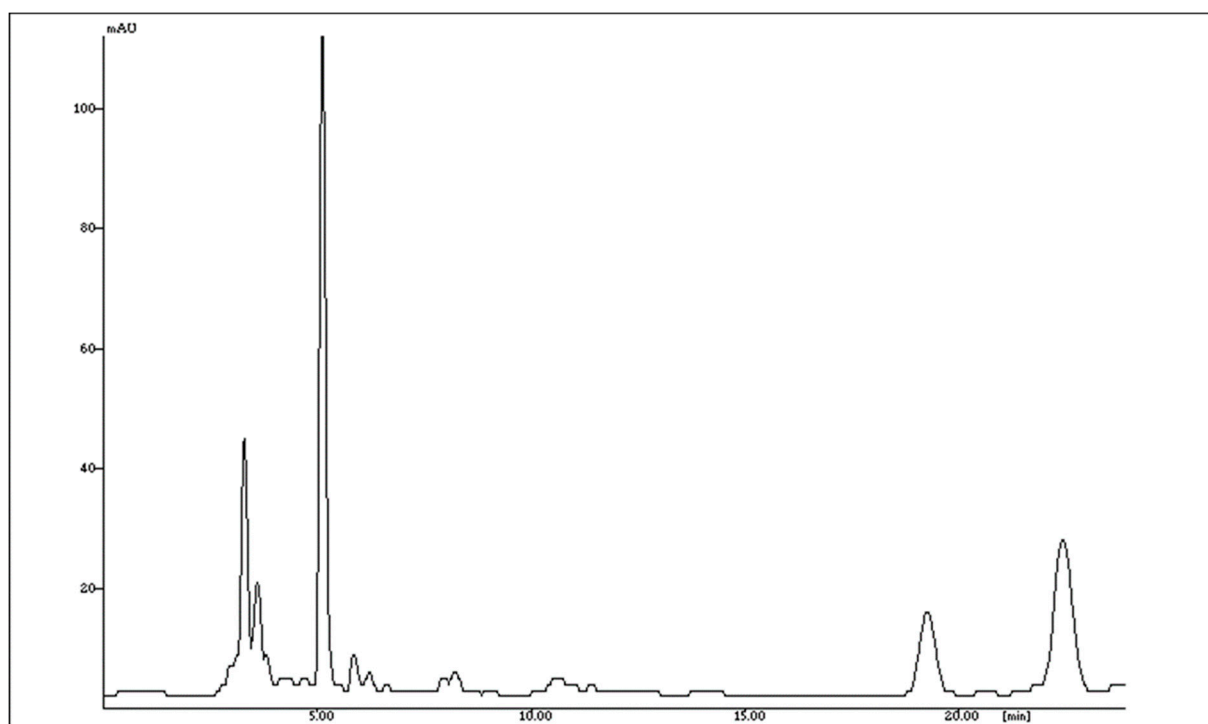

|   | Peak Name | Rt (Min) | Abs.Wind | %. Wind | Area   | Factor  | Peak.Group |
|---|-----------|----------|----------|---------|--------|---------|------------|
| 1 | 1         | 3.275    | 0.10     | 0.00    | 263.00 | 1.00000 |            |
| 2 | 2         | 19.217   | 0.10     | 0.00    | 354.50 | 1.00000 |            |
| 3 | 2         | 22.375   | 0.10     | 0.00    | 704.50 | 1.00000 |            |

**HPLC chromatogram 8.** Sulfoxidation catalyzed by HT21-ABr2•CuL.

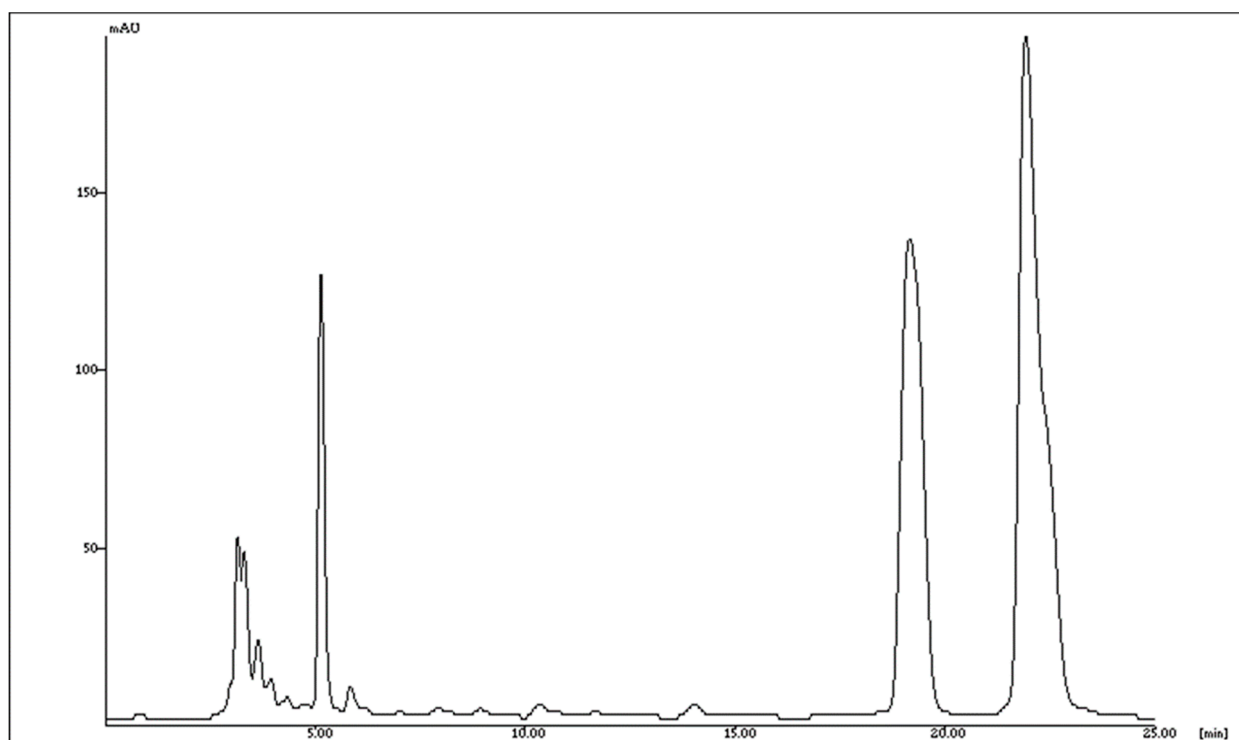

|   | Peak Name | Rt (Min) | Abs.Wind | %. Wind | Area    | Factor  | Peak.Group |
|---|-----------|----------|----------|---------|---------|---------|------------|
| 1 | 2         | 3.125    | 0.10     | 0.00    | 686.25  | 1.00000 |            |
| 2 | 2         | 19.125   | 0.10     | 0.00    | 4409.50 | 1.00000 |            |
| 3 | 2         | 21.892   | 0.10     | 0.00    | 6915.00 | 1.00000 |            |

### HPLC chromatogram 9. Sulfoxidation catalyzed by HT21-ABr3•CuL.

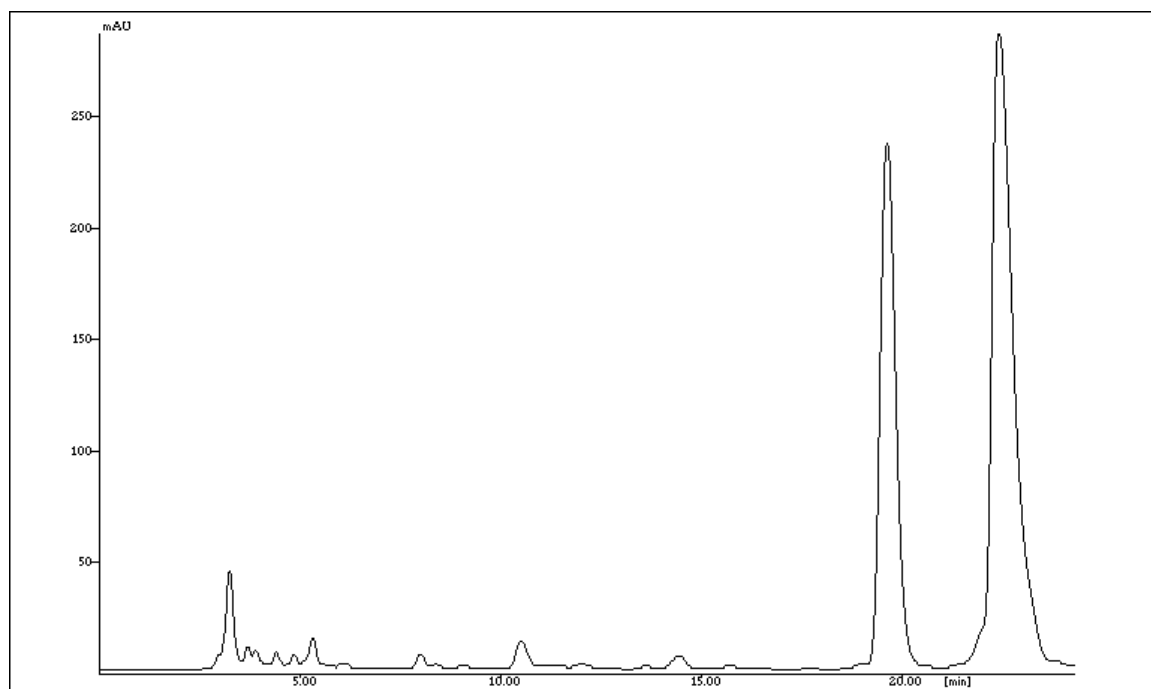

|   | Peak Name | Rt (Min) | Abs. Wind | %. Wind | Area    | Factor  | Peak.Group |
|---|-----------|----------|-----------|---------|---------|---------|------------|
| 1 | 1         | 3.233    | 0.10      | 0.00    | 473.25  | 1.00000 |            |
| 2 | 2         | 19.608   | 0.10      | 0.00    | 5675.33 | 1.00000 |            |
| 3 | 2bis      | 22.392   | 0.10      | 0.00    | 9849.00 | 1.00000 |            |

### ESI-MS spectrum of CuL complex

L4\_25092020 #9-76 RT: 0.02-0.16 AV: 68 NL: 1.00E7  
T: ITMS + c ESI Full ms [100.00-1000.00]

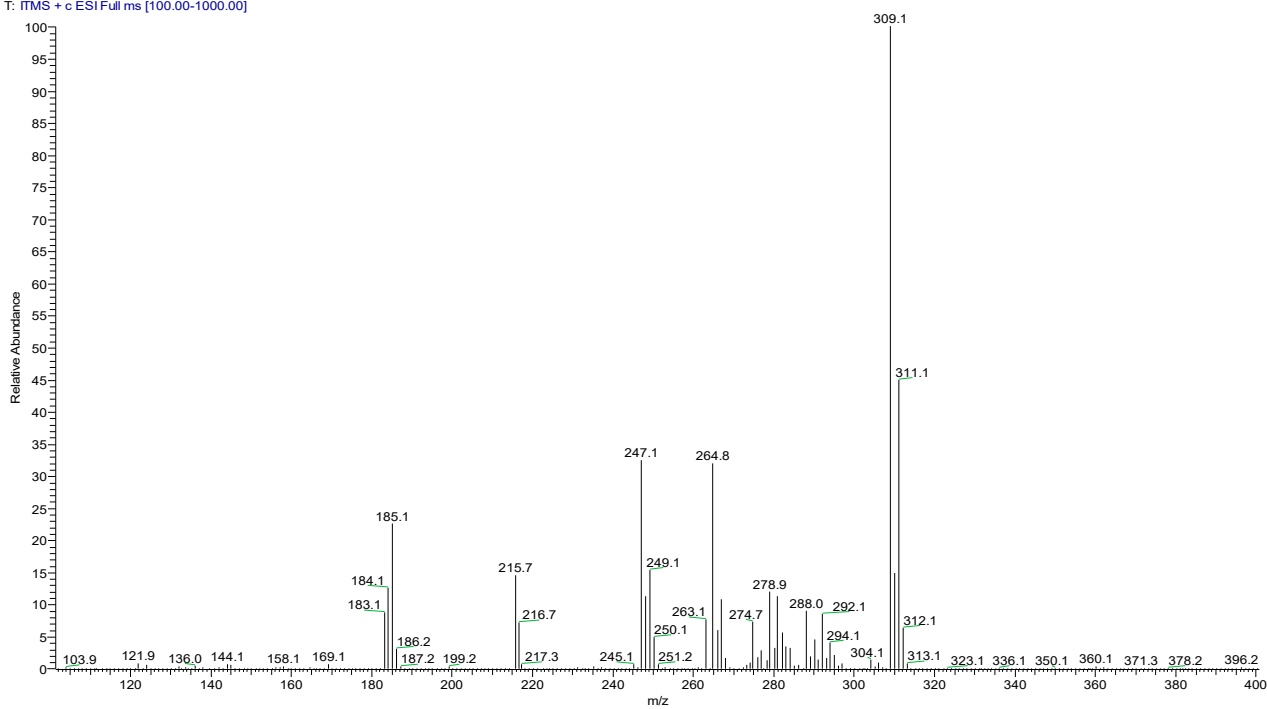

Supplement: s1 [file s1]
